# Supplementary material
Source: PubMed Central journal article supplement (PMC1941792)

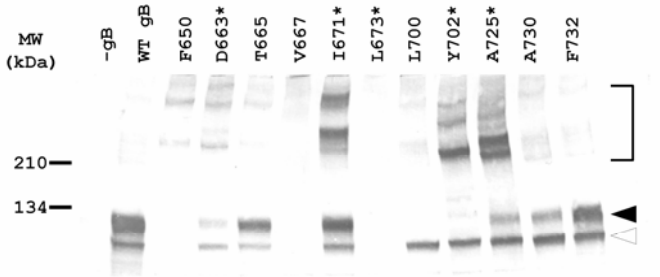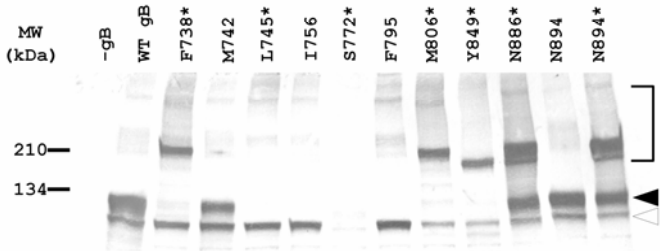

Supplement: pnas_0705926104_1.pdf [file pnas_0705926104_1.pdf]

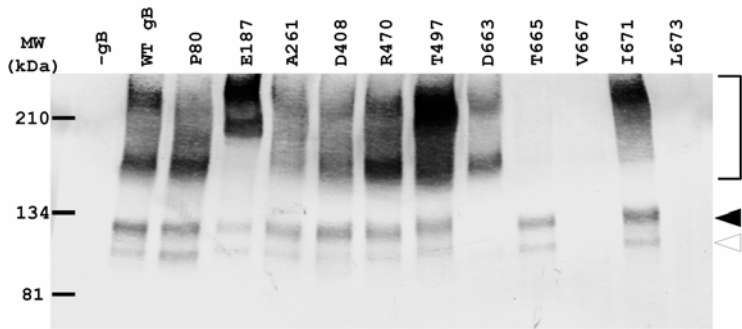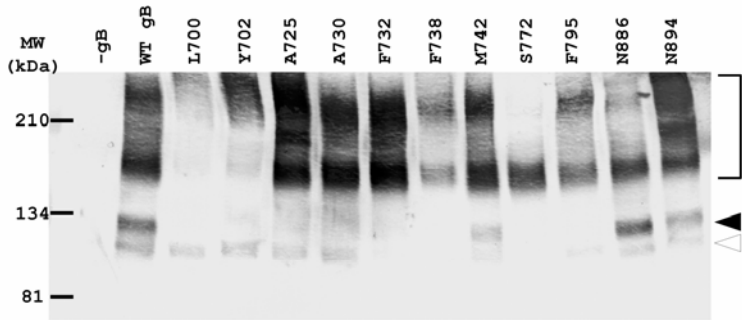

Supplement: pnas_0705926104_2.pdf [file pnas_0705926104_2.pdf]
